# Supplementary material for: Estimating hub-height wind speed based on a machine learning algorithm: implications for wind energy assessment
Source: Copernicus journal article supplement (doi:10.5194/acp-23-3181-2023), 2023-03-10
Supplement: Supplementary file 1 [file acp-23-3181-2023-supplement.pdf]

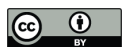

*Supplement of*

## **Estimating hub-height wind speed based on a machine learning algorithm: implications for wind energy assessment**

**Boming Liu et al.**

*Correspondence to:* Jianping Guo (jpguocams@gmail.com)

The copyright of individual parts of the supplement might differ from the article licence.

**Table S1.** Summary of the parameters used for machine learning algorithms.

| Type of parameters | Name of parameters         | Acronyms          | Data sources |
|--------------------|----------------------------|-------------------|--------------|
| Input              | Charnock coefficient       | Char              | ERA5         |
|                    | Forecast surface roughness | FSR               | ERA5         |
|                    | Friction velocity          | FV                | ERA5         |
|                    | Dew point                  | DP                | ERA5         |
|                    | Temperature                | Temp              | ERA5         |
|                    | Pressure                   | Pres              | ERA5         |
|                    | Net solar radiation        | Rn                | ERA5         |
|                    | Latent heat flux           | LHF               | ERA5         |
|                    | Sensible heat flux         | SHF               | ERA5         |
|                    | Surface wind speed         | WS <sub>10</sub>  | Anemometer   |
|                    | Surface wind direction     | WD <sub>10</sub>  | Anemometer   |
|                    | Wind speed at 300 m        | WS <sub>300</sub> | RWP          |
|                    | Wind direction at 300 m    | WD <sub>300</sub> | RWP          |
|                    | Wind speed at 120 m        | WS <sub>120</sub> | RS           |
| Reference          | Wind speed at 160 m        | WS <sub>160</sub> | RS           |
|                    | Wind speed at 200 m        | WS <sub>200</sub> | RS           |

**Figures:**

35

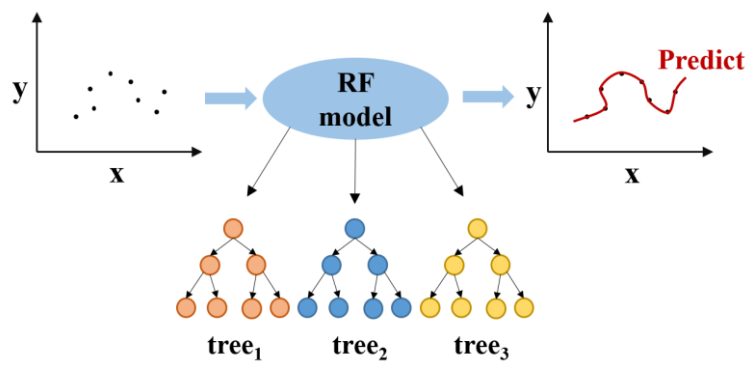

**Figure S1.** Schematic diagram of the random forest (RF) algorithms used to estimate wind speed.

40

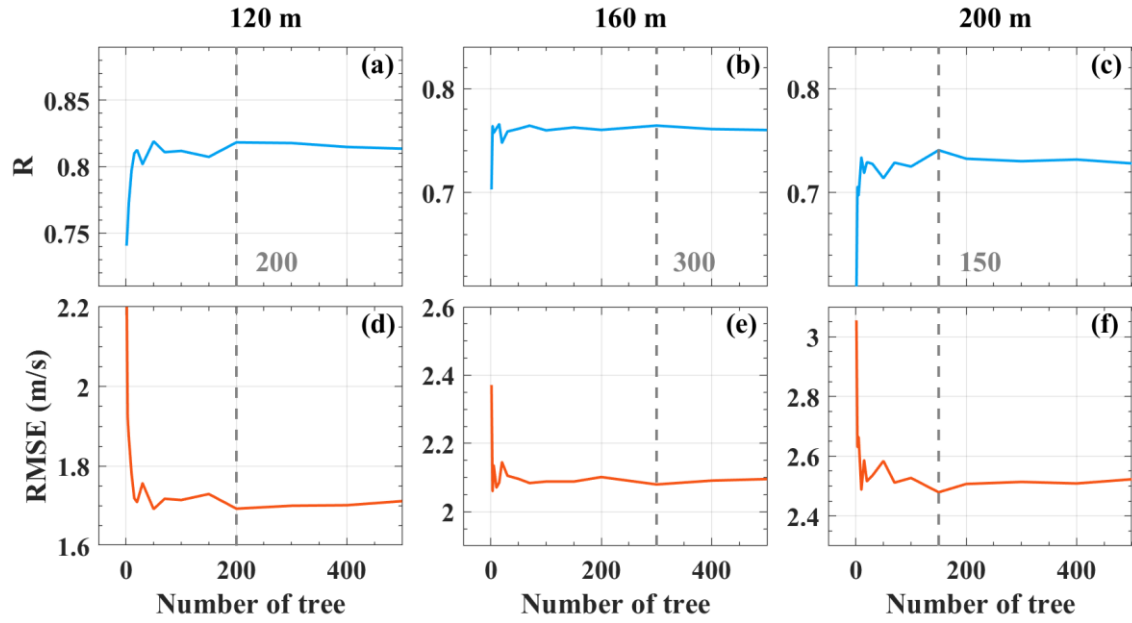

**Figure S2.** The parameter tuning process for RF model at (a, d) 120 m, (b, e) 160 m and (c, f) 200 m. The blue and red lines represent the variation of R and RMSE, respectively. The gray dotted lines and texts indicate the optimal parameters for their corresponding models.

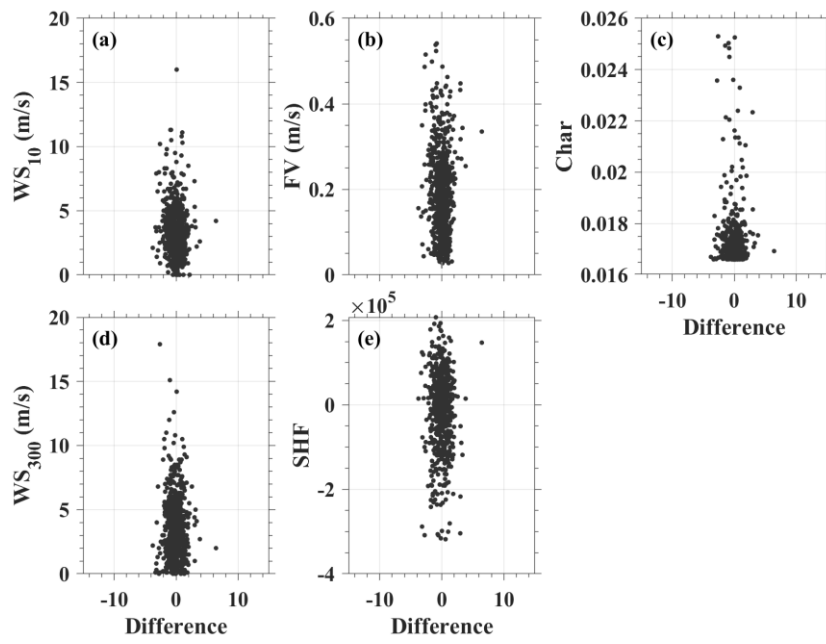

**Figure S3.** Scatter plots showing the difference of observed  $WS_{120}$  and estimated  $WS_{120}$  as a function of (a)  $WS_{10}$ , (b)  $FV$ , (c)  $Char$ , (d)  $WS_{300}$ , and (e)  $SHF$ .

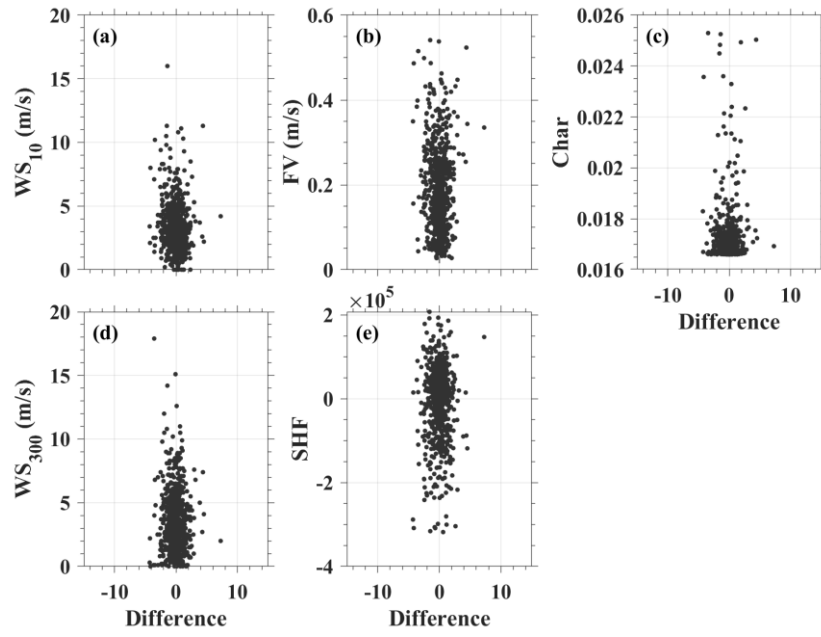

**Figure S4.** Similar to Fig. S3, but for the WS<sub>160</sub>.

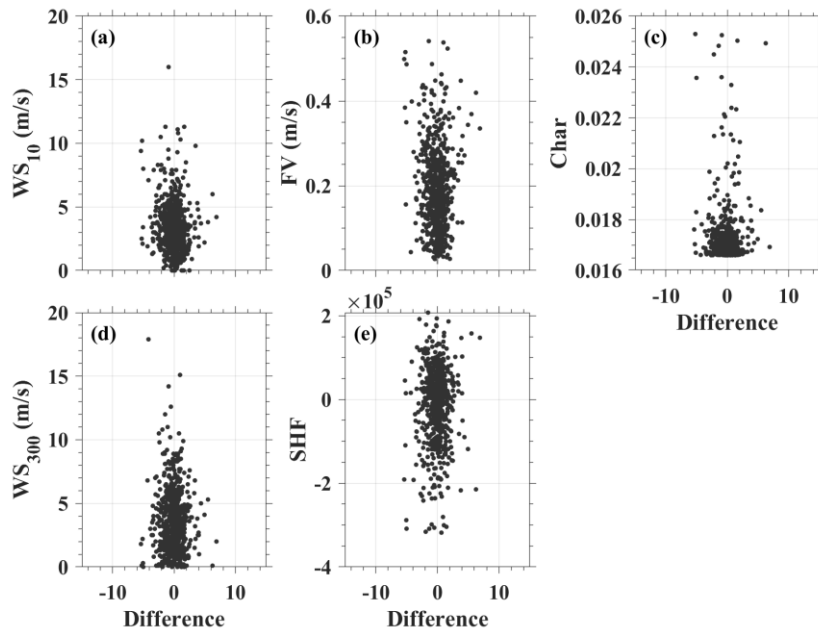

55

**Figure S5.** Similar to Fig. S3, but for the  $WS_{200}$ .

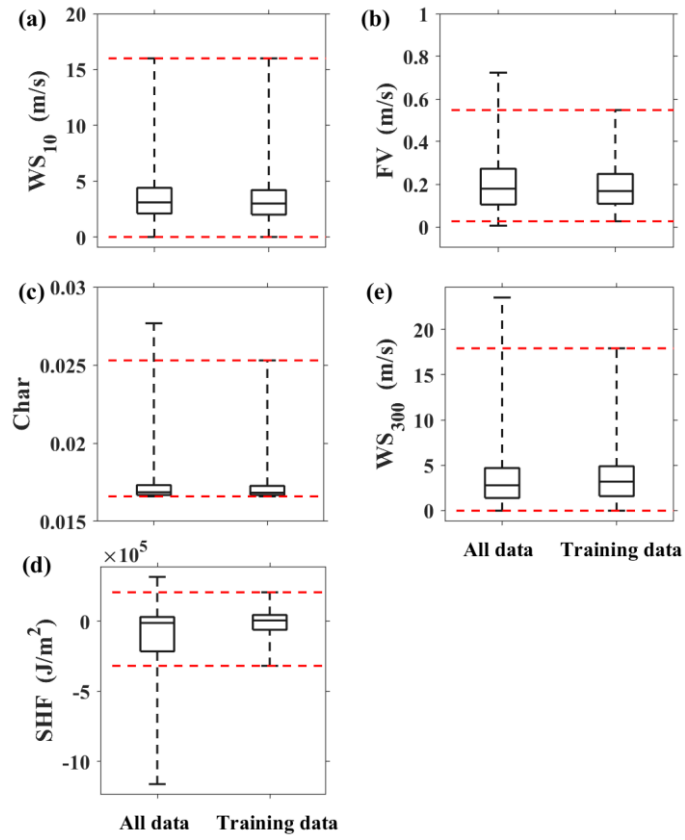

**Figure S6.** The box plot of (a)  $WS_{10}$ , (b) FV, (c) Char, (d)  $WS_{300}$ , and (e) SHF for different sample data set. The red dashed lines represent the maximum and minimum values of training data.



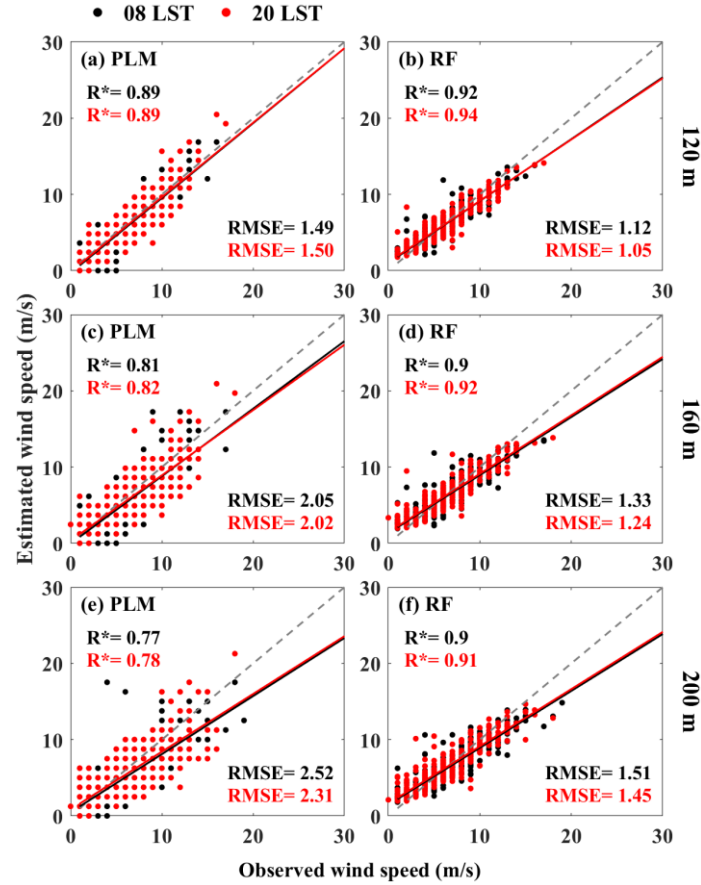

**Figure S7.** Comparisons between observed wind speed and estimated wind speed for (a, b, c) PLM and (d, e, f) RF at 120 m, 160 m and 200 m under different time. The red and black represent 0800 and 2000 local solar time, respectively. The asterisk indicates that the correlation coefficient ( $R$ ) has passed the t-test at a confidence level of 95%.
